# Supplementary material
Source: ML conference proceedings conference paper supplement (https://proceedings.neurips.cc/paper_files/paper/2014/hash/fa83a11a198d5a7f0bf77a1987bcd006-Abstract.html)
Supplement: Supplementary file [file fa83a11a198d5a7f0bf77a1987bcd006-Supplemental.zip]

---

# Supplemental Material

## Covariance shrinkage for autocorrelated data

---

**Daniel Bartz**

Department of Computer Science  
TU Berlin, Berlin, Germany  
daniel.bartz@tu-berlin.de

**Klaus-Robert Müller**

TU Berlin, Berlin, Germany  
Korea University, Korea, Seoul  
klaus-robert.mueller@tu-berlin.de

### 1 Theoretical results

Our theoretical results are based on the analysis of a sequence of statistical models indexed by  $p$ .  $\mathbf{X}_p$  denotes a  $p \times n$  matrix of  $n$  observations of  $p$  variables with mean zero and covariance matrix  $\mathbf{C}_p$ .  $\mathbf{Y}_p = \mathbf{R}_p^T \mathbf{X}_p$  denotes the same observations in their eigenbasis, having diagonal covariance  $\mathbf{\Lambda}_p = \mathbf{R}_p^T \mathbf{C}_p \mathbf{R}_p$ . Lower case letters  $x_{it}^p$  and  $y_{it}^p$  denote the entries of  $\mathbf{X}_p$  and  $\mathbf{Y}_p$ , respectively<sup>1</sup>. We will restrict the analysis of the Sancetta-estimator to the truncated kernel  $\kappa_{\text{TR}}$  to obtain clearer formulas. This *reduces* the bias.

Note that the whole shrinkage framework is invariant to rotations. Switching to the eigenbasis, in which we denote the sample covariance by  $\mathbf{S}'$ , often simplifies the analysis.

The analysis is based on the following assumptions:

**Assumption 1 (A1, bound on average eighth moment).** *There exists a constant  $K_1$  independent of  $p$  such that*

$$\frac{1}{p} \sum_{i=1}^p \mathbb{E}[(x_{i1}^p)^8] \leq K_1.$$

**Assumption 2 (A2, uncorrelatedness of higher moments).** *Let  $Q$  denote the set of quadruples  $\{i, j, k, l\}$  of distinct integers.*

$$\forall s : \lim_{p \rightarrow \infty} \frac{\sum_{i,j,k,l \in Q_p} \text{Cov}^2[y_{i1}^p y_{j1}^p, y_{k1+s}^p y_{l1+s}^p]}{|Q_p|} = \mathcal{O}(p^{-1}),$$

and

$$\forall s : \lim_{p \rightarrow \infty} \frac{\sum_{i,j,k,l \in Q_p} \text{Cov}[(y_{i1}^p y_{j1}^p)^2, (y_{k1+s}^p y_{l1+s}^p)^2]}{|Q_p|} = \mathcal{O}(p^{-1}),$$

hold.

**Assumption 3 (A3, non-degeneracy).** *There exists a constant  $K_2$  such that*

$$\frac{1}{p} \sum_{i=1}^p \mathbb{E}[(x_{i1}^p)^2] \geq K_2.$$

**Assumption 4 (A4, moment relation).**  $\exists \alpha_4, \alpha_8, \beta_4$  and  $\beta_8$ :

$$\begin{aligned} \mathbb{E}[y_i^8] &\leq (1 + \alpha_8) \mathbb{E}^2[y_i^4] & \mathbb{E}[y_i^4] &\leq (1 + \alpha_4) \mathbb{E}^2[y_i^2] \\ \mathbb{E}[y_i^8] &\geq (1 + \beta_8) \mathbb{E}^2[y_i^4] & \mathbb{E}[y_i^4] &\geq (1 + \beta_4) \mathbb{E}^2[y_i^2] \end{aligned}$$

---

<sup>1</sup>We shall often drop the sequence index  $p$  and the observation index  $t$  to improve readability of formulas.

**Remarks on the assumptions** A restriction on the eighth moment (assumption **A1**) is necessary because the considered estimators contain fourth moments, their variance therefore is an eighths moment. Note that, contrary to the similar assumption in the eigenbasis in [LW04], **A1** poses no restriction on the covariance structure [BM13].

To quantify how averaging over dimensions occurs, assumption **A2** restricts the correlations of higher moments in the eigenbasis. This assumption is trivially fulfilled for gaussian data, but much weaker (cmp. [LW04]).

Assumption **A3** rules out the degenerate case of adding observation channels without any variance and assumption **A4** excludes distributions with arbitrarily heavy tails.

Based on these assumptions, we can analyse the difference between the Sancetta estimator and our proposed estimator for large  $p$ :

**Theorem 1** (consistency under “fixed  $n$ ”-asymptotics). *Let **A1**, **A2**, **A3**, **A4** hold. We then have*

$$\frac{1}{p^2} \sum_{ij} \text{Var}(S_{ij}) = \Theta(1) \quad (1)$$

$$\mathbb{E} \left\| \frac{1}{p^2} \sum_{ij} \left( \widehat{\text{Var}}(S_{ij})^{\text{San},b} - \text{Var}(S_{ij}) \right) \right\|^2 = (Bias^{\text{San},b} + Bias_{TR}^{\text{San},b})^2 + \mathcal{O} \left( \frac{\sum_j \gamma_j^2}{(\sum_j \gamma_j)^2} \right) \quad (2)$$

$$\mathbb{E} \left\| \frac{1}{p^2} \sum_{ij} \left( \widehat{\text{Var}}(S_{ij})^{BC,b} - \text{Var}(S_{ij}) \right) \right\|^2 = (Bias_{TR}^{BC,b})^2 + \mathcal{O} \left( \frac{\sum_j \gamma_j^2}{(\sum_j \gamma_j)^2} \right) \quad (3)$$

where the  $\gamma_i$  denote the eigenvalues of  $\mathbf{C}$  and

$$Bias^{\text{San},b} := -\frac{1}{p^2} \sum_{ij} \left\{ \frac{1+2b-b(b+1)/n}{n} \text{Var}(S_{ij}) - \frac{4}{n^3} \sum_{s=1}^b \sum_{t=n-s}^n \sum_{u=1}^n \text{Cov}[x_{it}x_{jt}, x_{iu}x_{ju}] \right\} \quad (4)$$

$$Bias_{TR}^{\text{San},b} := -\frac{1}{p^2} \frac{2}{n} \sum_{ij} \sum_{s=b+1}^n \frac{n-s}{n} \text{Cov}[x_{it}x_{jt}, x_{i,t+s}x_{j,t+s}] \quad (5)$$

$$Bias_{TR}^{BC,b} := -\frac{1}{p^2} \frac{2}{n-1-2b+\frac{b(b+1)}{n}} \sum_{ij} \sum_{s=b+1}^{n-1} \text{Cov}[x_{it}x_{jt}, x_{i,t+s}x_{j,t+s}] \quad (6)$$

*Proof.* The first statement eq. (1) follows directly from the assumptions (cmp. [BM13]). The error expressions follow from a decomposition into bias and variance.

**Bias of the Sancetta estimator** Let us first restate the estimator:

$$\hat{\Gamma}_{ij}^{\text{San}}(s) := \frac{1}{n} \sum_{t=1}^{n-s} (x_{it}x_{jt} - S_{ij})(x_{i,t+s}x_{j,t+s} - S_{ij}), \quad (7)$$

$$\widehat{\text{Var}}(S_{ij})^{\text{San},b} := \frac{1}{n} \hat{\Gamma}_{ij}^{\text{San}}(0) + \frac{2}{n} \sum_{s=1}^{n-1} \kappa(s/b) \hat{\Gamma}_{ij}^{\text{San}}(s), \quad b > 0, \quad (8)$$

We start by calculating the bias of the autocovariance estimator eq. (7):

$$\begin{aligned} \mathbb{E} \left[ \hat{\Gamma}_{ij}^{\text{San}}(s) \right] &= \mathbb{E} \left[ \frac{1}{n} \sum_{t=1}^{n-s} (x_{it}x_{jt} - S_{ij})(x_{i,t+s}x_{j,t+s} - S_{ij}) \right], \\ &= \frac{1}{n} \sum_{t=1}^{n-s} \{ \mathbb{E}[x_{it}x_{jt}x_{i,t+s}x_{j,t+s}] - \mathbb{E}[x_{it}x_{jt}S_{ij}] - \mathbb{E}[S_{ij}x_{i,t+s}x_{j,t+s}] + \mathbb{E}[S_{ij}S_{ij}] \} \\ \mathbb{E}[x_{it}x_{jt}S_{ij}] &= \mathbb{E} \left[ x_{it}x_{jt} \frac{1}{n} \sum_{u=1}^n x_{iu}x_{ju} \right] = \frac{1}{n} \sum_{u=1}^n \mathbb{E}[x_{it}x_{jt}x_{iu}x_{ju}] \end{aligned}$$

$$\begin{aligned}
\mathbb{E}[S_{ij}S_{ij}] &= \mathbb{E}\left[\frac{1}{n}\sum_{v=1}^n x_{iv}x_{jv}\frac{1}{n}\sum_{u=1}^n x_{iu}x_{ju}\right] = \frac{1}{n^2}\sum_{u,v=1}^n \mathbb{E}[x_{iv}x_{jv}x_{iu}x_{ju}] \\
&= \frac{n-s}{n}\mathbb{E}[x_{it}x_{jt}x_{i,t+s}x_{j,t+s}] - \frac{2}{n^2}\sum_{t=1}^{n-s}\sum_{u=1}^n \mathbb{E}[x_{it}x_{jt}x_{iu}x_{ju}] + \frac{n-s}{n^3}\sum_{t,u=1}^n \mathbb{E}[x_{it}x_{jt}x_{iu}x_{ju}] \\
&= \frac{n-s}{n}\text{Cov}[x_{it}x_{jt}, x_{i,t+s}x_{j,t+s}] - \frac{2}{n^2}\sum_{t=1}^{n-s}\sum_{u=1}^n \text{Cov}[x_{it}x_{jt}, x_{iu}x_{ju}] + \frac{n-s}{n^3}\sum_{t,u=1}^n \text{Cov}[x_{it}x_{jt}, x_{iu}x_{ju}] \\
&= \frac{n-s}{n}\text{Cov}[x_{it}x_{jt}, x_{i,t+s}x_{j,t+s}] - \frac{2}{n^2}\sum_{t=1}^{n-s}\sum_{u=1}^n \text{Cov}[x_{it}x_{jt}, x_{iu}x_{ju}] + \frac{2}{n^2}\sum_{t=n-s}^n\sum_{u=1}^n \text{Cov}[x_{it}x_{jt}, x_{iu}x_{ju}] \\
&\quad + \frac{1}{n^2}\sum_{t,u=1}^n \text{Cov}[x_{it}x_{jt}, x_{iu}x_{ju}] - \frac{s}{n^3}\sum_{t,u=1}^n \text{Cov}[x_{it}x_{jt}, x_{iu}x_{ju}] \\
&= \frac{n-s}{n}\text{Cov}[x_{it}x_{jt}, x_{i,t+s}x_{j,t+s}] - \frac{n+s}{n}\text{Var}[S_{ij}] + \frac{2}{n^2}\sum_{t=n-s}^n\sum_{u=1}^n \text{Cov}[x_{it}x_{jt}, x_{iu}x_{ju}]
\end{aligned}$$

For the bias of the whole variance estimator eq. (8), we then have

$$\begin{aligned}
\mathbb{E}[\widehat{\text{Var}}(S_{ij})^{\text{San,b}}] &= \frac{1}{n}\mathbb{E}\left[\hat{\Gamma}_{ij}^{\text{San}}(0) + 2\sum_{s=1}^{n-1}\kappa(s/b)\hat{\Gamma}_{ij}^{\text{San}}(s)\right] \\
&= \frac{1}{n}\text{Var}[x_{it}x_{jt}] + \frac{2}{n}\sum_{s=1}^{n-1}\frac{n-s}{n}\kappa(s/b)\text{Cov}[x_{it}x_{jt}, x_{i,t+s}x_{j,t+s}] \\
&\quad - \frac{1}{n}\text{Var}(S_{ij})\left(1 + 2\sum_{s=1}^{n-1}\frac{n+s}{n}\kappa(s/b)\right) \\
&\quad + \frac{4}{n^3}\left(\sum_{s=1}^{n-1}\sum_{t=n-s}^n\sum_{u=1}^n \text{Cov}[x_{it}x_{jt}, x_{iu}x_{ju}]\kappa(s/b)\right)
\end{aligned}$$

Plugging in the truncated kernel, we obtain

$$\begin{aligned}
\mathbb{E}[\widehat{\text{Var}}(S_{ij})^{\text{San,b}}] &= \frac{1}{n}\text{Var}[x_{it}x_{jt}] + \frac{2}{n}\sum_{s=1}^b\frac{n-s}{n}\text{Cov}[x_{it}x_{jt}, x_{i,t+s}x_{j,t+s}] \\
&\quad - \frac{1}{n}\text{Var}(S_{ij})\left(1 + 2\sum_{s=1}^b\frac{n+s}{n}\right) \\
&\quad + \frac{4}{n^3}\left(\sum_{s=1}^b\sum_{t=n-s}^n\sum_{u=1}^n \text{Cov}[x_{it}x_{jt}, x_{iu}x_{ju}]\right) \\
&= \text{Var}(S_{ij}) - \frac{2}{n}\sum_{s=b+1}^n\frac{n-s}{n}\text{Cov}[x_{it}x_{jt}, x_{i,t+s}x_{j,t+s}] \\
&\quad - \frac{1}{n}\text{Var}(S_{ij})\left(1 + 2\sum_{s=1}^b\frac{n+s}{n}\right) \\
&\quad + \frac{4}{n^3}\left(\sum_{s=1}^b\sum_{t=n-s}^n\sum_{u=1}^n \text{Cov}[x_{it}x_{jt}, x_{iu}x_{ju}]\right)
\end{aligned}$$

We have shown that eq. (4) and eq. (5) hold.

**Bias of the BC-estimator** Let us again first restate the estimator:

$$\hat{\Gamma}_{ij}^{\text{BC}}(s) := \frac{1}{n}\sum_{t=1}^{n-s}(x_{it}x_{jt}x_{i,t+s}x_{j,t+s} - S_{ij}^2), \quad (9)$$

$$\widehat{\text{Var}}(S_{ij})^{\text{BC,b}} := \frac{1}{n-1-2b+b(b+1)/n} \left( \hat{\Gamma}_{ij}^{\text{BC}}(0) + 2 \sum_{s=1}^{n-1} \kappa_{\text{TR}}(s/b) \hat{\Gamma}_{ij}^{\text{BC}}(s) \right). \quad (10)$$

For the bias-corrected estimator, we also start by calculating the bias of the autocovariance estimator eq. (9):

$$\begin{aligned} \mathbb{E} \left[ \hat{\Gamma}_{ij}^{\text{BC}}(s) \right] &= \mathbb{E} \left[ \frac{1}{n} \sum_{t=1}^{n-s} (x_{it} x_{jt} x_{i,t+s} x_{j,t+s} - S_{ij}^2) \right] \\ &= \mathbb{E} [x_{it} x_{jt} x_{i,t+s} x_{j,t+s}] - \mathbb{E} [S_{ij}^2] \\ &= \mathbb{E} [x_{it} x_{jt} x_{i,t+s} x_{j,t+s}] - \text{Var} [S_{ij}] - \mathbb{E}^2 [S_{ij}] \\ &= \mathbb{E} [x_{it} x_{jt} x_{i,t+s} x_{j,t+s}] - \text{Var} [S_{ij}] - \mathbb{E}^2 [(x_{it} x_{jt})] \\ &= \frac{n-s}{n} \text{Cov} [x_{it} x_{jt}, x_{i,t+s} x_{j,t+s}] - \frac{n-s}{n} \text{Var} [S_{ij}] \end{aligned}$$

Plugging this into the expression for the whole variance estimator eq. (10), we obtain

$$\begin{aligned} \mathbb{E} \left[ \widehat{\text{Var}}(S_{ij})^{\text{BC,b}} \right] &= \frac{1}{n-1-2b+\frac{b(b+1)}{n}} \mathbb{E} \left[ \hat{\Gamma}_{ij}^{\text{BC}}(0) + 2 \sum_{s=1}^{n-1} \kappa_{\text{TR}}(s/b) \hat{\Gamma}_{ij}^{\text{BC}}(s) \right] \\ &= \frac{1}{n-1-2b+\frac{b(b+1)}{n}} \left( \text{Var} [x_{it} x_{jt}] + 2 \sum_{s=1}^b \frac{n-s}{n} \text{Cov} [x_{it} x_{jt}, x_{i,t+s} x_{j,t+s}] \right. \\ &\quad \left. - (1+2b-\frac{b(b+1)}{n}) \text{Var} [S_{ij}] \right) \\ &= \frac{1}{n-1-2b+\frac{b(b+1)}{n}} \left( n \text{Var} [S_{ij}] - 2 \sum_{s=b+1}^{n-1} \frac{n-s}{n} \text{Cov} [x_{it} x_{jt}, x_{i,t+s} x_{j,t+s}] \right. \\ &\quad \left. - (1+2b-\frac{b(b+1)}{n}) \text{Var} [S_{ij}] \right) \\ &= \text{Var} [S_{ij}] - \frac{2}{n-1-2b+\frac{b(b+1)}{n}} \sum_{s=b+1}^{n-1} \frac{n-s}{n} \text{Cov} [x_{it} x_{jt}, x_{i,t+s} x_{j,t+s}]. \end{aligned}$$

We have shown that eq. (6) holds.

**Bound on the variance** The variance terms are more involved: Let us exemplarily consider the variance of

$$\frac{1}{p^2} \widehat{\text{Var}}(S'_{ij})^{\text{BC,b}} = \frac{1}{p^2(n-1-2b)} \sum_{ij} \left( \hat{\Gamma}_{ij}^{\text{BC}}(0) + 2 \sum_{s=1}^{n-1} \kappa_{\text{TR}}(s/b) \hat{\Gamma}_{ij}^{\text{BC}}(s) \right),$$

We can simplify the analysis of the variance of this expression by looking at each  $\hat{\Gamma}(s)$  separately: there is only a finite number of terms. Derivations are similar for all terms, we here only show the first term:

$$\text{Var} \left( \frac{1}{p^2(n-1-2b)} \sum_{ij} \hat{\Gamma}_{ij}(0) \right) = \text{Var} \left( \frac{1}{p^2(n-1-b)n} \sum_{ij} \left( \sum_s y_{is}^2 y_{js}^2 - \frac{1}{n} \sum_{ss'} y_{is'} y_{js'} y_{is} y_{js} \right) \right)$$

Ignoring constants we again treat each term separately, the first term yields

$$\begin{aligned} \text{Var} \left( \frac{1}{p^2} \sum_{ij} y_{i1}^2 y_{j1}^2 \right) &= \frac{1}{p^4} \sum_{ijkl} \text{Cov} (y_{i1}^2 y_{j1}^2, y_{k1}^2 y_{l1}^2) \\ &= \frac{1}{p^4} \sum_{i,j,i',j' \in Q} \text{Cov} (y_{i1}^2 y_{j1}^2, y_{k1}^2 y_{l1}^2) + \frac{1}{p^4} \sum_{i,j,i',j' \in R} \text{Cov} (y_{i1}^2 y_{j1}^2, y_{k1}^2 y_{l1}^2). \end{aligned}$$

where we decomposed the set of integers into two disjoint subsets:  $\{1, \dots, p\}^4 = Q \cup R$ , where  $Q$  is the set of distinct integers and  $R$  is the remainder. The first term is taken care of by **A4**. For the second term,  $(i, i', j, j') \in R$ , we have

$$\begin{aligned}
& \frac{1}{p^4} \sum_{(i, i', j, j') \in R} \text{Cov}(y_{i1}^2 y_{j1}^2, y_{i'1}^2 y_{j'1}^2) \\
& \leq \frac{6}{p^4} \sum_{i, j, i'} \text{Cov}(y_{i1}^2 y_{j1}^2, y_{i'1}^2 y_{i1}^2) + \text{Cov}(y_{i1}^2 y_{j1}^2, y_{i'1}^4) \\
& \leq \frac{6}{p^4} \sum_{i, j, i'} \sqrt{\mathbb{E}[y_{i1}^4 y_{j1}^4]} \sqrt{\mathbb{E}[y_{i'1}^4 y_{i1}^4]} + \sqrt{\mathbb{E}[y_{i1}^4 y_{j1}^4]} \sqrt{\mathbb{E}[y_{i'1}^8]} \\
& \leq \frac{6}{p^4} \sum_{i, j, i'} \sqrt[4]{\mathbb{E}[y_{i1}^8] \mathbb{E}[y_{j1}^8]} \sqrt[4]{\mathbb{E}[y_{i'1}^8] \mathbb{E}[y_{i1}^8]} + \sqrt[4]{\mathbb{E}[y_{i1}^8] \mathbb{E}[y_{j1}^8]} \sqrt{\mathbb{E}[y_{i'1}^8]} \\
& \leq \frac{12(1 + \alpha_8)}{p^4} \sum_{i, j, i'} \mathbb{E}[y_{i1}^2] \mathbb{E}[y_{j1}^2] \mathbb{E}^2[y_{i'1}^2] \\
& = \mathcal{O}\left(\frac{\sum_i \gamma_i^2}{(\sum_i \gamma_i)^2}\right),
\end{aligned}$$

where in the last equality we have used that  $\sum_{i=1}^p \gamma_i = \Theta(p)$ . The same asymptotic behaviour can be derived for the other terms following very similar steps. The bounds in eq. (2) and eq. (3) follow.  $\square$

## References

- [BM13] Daniel Bartz and Klaus-Robert Müller. Generalizing analytic shrinkage for arbitrary covariance structures. In C.J.C. Burges, L. Bottou, M. Welling, Z. Ghahramani, and K.Q. Weinberger, editors, *Advances in Neural Information Processing Systems 26*, pages 1869–1877. 2013.
- [LW04] Olivier Ledoit and Michael Wolf. A well-conditioned estimator for large-dimensional covariance matrices. *Journal of Multivariate Analysis*, 88(2):365–411, 2004.
